# Supplementary material for: Photocatalytic degradation of norfloxacin on different TiO2−X polymorphs under visible light in water
Source: Royal Society of Chemistry journal article supplement (doi:10.1039/c7ra09022f), 2017-01-01
Supplement: c7ra09022f1.pdf [file c7ra09022f1.pdf]

## Supplementary Materials

### Photocatalytic Degradation of Norfloxacin on Different TiO<sub>2</sub>-X Polymorphs under Visible Light in Water

Hai Yang<sup>a,b</sup>, Liangyong Mei<sup>b</sup>, Pengcheng Wang<sup>b</sup>, Joseph Genereux<sup>b</sup>, Yinsheng Wang<sup>b</sup>,  
Bing Yi<sup>a</sup>, Chaktong Au<sup>a</sup>, Limin Dang<sup>a</sup>, Pingyun Feng<sup>b\*</sup>

*<sup>a</sup>College of Chemistry and Chemical Engineering, Hunan Institute of Engineering,  
Xiangtan 411104, PR China*

*<sup>b</sup>Department of Chemistry, University of California, Riverside, California 92521,  
United States*

---

\*Corresponding author. [pingyun.feng@ucr.edu](mailto:pingyun.feng@ucr.edu)

## **Preparation of different TiO<sub>2-x</sub>polymorps**

**Preparation of Cat.I-A:** The synthetic procedure of Cat.I-A was reported elsewhere [1]. Typically, 0.7 g of L-ascorbic acid was added to 70 mL of deionized water, and the mixture was stirred for 10 min using a magnetic stirrer. Subsequently, 3.1 mL of TiCl<sub>3</sub> was added and a purple solution was formed. Then, NaOH solution (1 mol/L) was added to raise the pH to 4. After stirring for another 30 min, the as-resulted mixture was transferred to a 100 mL Teflon-lined stainless steel autoclave and heated at 180 °C for 12 h. The obtained precipitate was collected by centrifugation, rinsed with water and ethanol for several times. After drying at 80°C overnight, the sample was obtained without further treatment.

**Preparation of Cat.II-R:** The method was reported elsewhere [2]. Typically, titanium powder (0.300 g) and hydrochloric acid (10 mL, 2 mol/L) were mixed in a 50 mL pyrex beaker and magnetically stirred for 15 min. The mixture was then transferred to a Teflon-lined stainless-steel autoclave (23 mL capacity) and hydrothermally treated for 12 h at 220°C. The sample was then collected and washed three times with distilled water and ethanol.

**Preparation of Cat.III-B:** In a typical synthetic process [3], TiH<sub>2</sub>(0.256 g) and H<sub>2</sub>O (2 mL) were mixed in a 50 mL round-bottomed flask, and the mixture was magnetically stirred for 5 min for the generation of a dark gray suspension. Then H<sub>2</sub>O<sub>2</sub>(30 mL, 30.0 wt%) as an oxidation agent was added dropwise, and the as-obtained mixture was vigorously stirred for 12 h to reach a yellowish gel-like state. After that, double distilled water (40 mL) was added under continuous magnetic stirring. As pH regulator, a certain amount of NaOH (1.0 M) solution was added gradually until the pH of this transparent solution which was light yellow in color reached 9.0. As a reducing agent, NaBH<sub>4</sub>(0.4 g) was added and the mixture was immediately transferred to a Teflon-lined stainless-steel autoclave and hydrothermally treated at 180°C for 24 h. The harvested material was then immersed in HCl (50.0 mL, 1.0 M) solution to eliminate the sodium boron compound. After 10 h of stirring, the powder was separated and was washed with distilled water and ethanol repetitively to

remove impurities such as  $\text{Na}^+$ ,  $\text{Cl}^-$ , and  $\text{BO}_3^{2-}$ . The as-obtained precipitate was dried under vacuum for 12 h to yield  $\text{TiO}_2$  nanocrystals in the form of grey blue powder. Post annealing of the  $\text{TiO}_{2-x}$  sample was conducted in a flow of argon using a tube furnace at 500 °C for 3 h to generate the Cat.III-B sample.

**Preparation of Cat.IV-A&R:** In a typical synthetic procedure [4], ethanol (10.00 g), 2-ethylimidazole (0.1-1.80 g), and hydrochloric acid (2.50 g) were mixed in a 50 mL pyrex beaker and magnetically stirred for 15 min to generate a clear solution. Then titanium (IV) isopropoxide (2.00g) was added dropwise, and the resulted mixture was stirred for another 15 min. The beaker with its content was then placed in a preheated oven (500 °C) for the content to undergo combustion. After 5 h, Cat IV was obtained with no further treatment. Different amounts of 2-ethylimidazole were used correspondingly to synthesize a variety of catalysts, i.e. 1.8 g for Cat.IV-1, 1.0 g for Cat.IV-2, 0.3 g for Cat.IV-3 and 0.1 g for Cat.IV-4.

## Reference

- [1] M.W. Shah, Y.Q. Zhu, X.Y. Fan, J. Zhao, Y.X. Li, S. Asim, C.Y. Wang, *Sci. Rep.* 5 (2015)15804-15812.
- [2] F. Zuo, K. Bozhilov, R.J. Dillon, L. Wang, P. Smith, X. Zhao, C. Bardeen, P.Y. Feng, *Angew. Chem. Int. Edit.* 51 (2012) 6223-6226.
- [3] X.Y. Xin, T. Xu, L. Wang, C.Y. Wang, *Sci. Rep.* 6 (2016) 23684-23692.
- [4] F. Zuo, L. Wang, T. Wu, Z.Y. Zhang, D. Borchardt, P.Y. Feng, *J. Am. Chem. Soc.* 132 (2010) 11856-11857.

**Table S1** Point charges (PCs) and frontier electron densities (FEDs) on atoms of *Nor* calculated by Gaussian 03 program at B3LYP/6-31G\* level.

| Atoms |                 |                 |                             |                |
|-------|-----------------|-----------------|-----------------------------|----------------|
|       | $2FED_{HOMO}^2$ | $2FED_{LUMO}^2$ | $FED_{HOMO}^2+FED_{LUMO}^2$ | PCs            |
| C1    | <b>0.2072</b>   | 0.0584          | 0.1328                      | 0.3827         |
| C2    | 0.0764          | <b>0.2956</b>   | <b>0.1860</b>               | 0.3509         |
| C3    | 0.0116          | <b>0.3202</b>   | <b>0.1659</b>               | -0.0312        |
| C4    | 0.0896          | 0.0014          | 0.0455                      | 0.4778         |
| C5    | <b>0.2510</b>   | 0.0686          | <b>0.1598</b>               | -0.2324        |
| C6    | 0.0178          | <b>0.4048</b>   | <b>0.2113</b>               | 0.1305         |
| N7    | <b>0.1976</b>   | 0.1290          | 0.1633                      | <b>-1.0801</b> |
| C8    | 0.0006          | <b>0.4666</b>   | <b>0.2336</b>               | <b>0.6766</b>  |
| C9    | 0.1346          | 0.0566          | 0.0956                      | -0.4368        |
| C10   | 0.0048          | 0.1662          | 0.0865                      | <b>0.6568</b>  |
| O11   | <b>0.1730</b>   | 0.1860          | <b>0.1795</b>               | <b>-0.6139</b> |
| F12   | 0.0574          | 0.0054          | 0.0314                      | -0.4057        |
| N13   | <b>0.2060</b>   | 0.0436          | 0.1248                      | <b>-0.8332</b> |
| C14   | 0.0020          | 0.0158          | 0.0089                      | 0.3334         |
| C15   | 0.0004          | 0.0038          | 0.0021                      | 0.0445         |
| C16   | 0.0010          | 0.0074          | 0.0042                      | <b>0.9415</b>  |
| C17   | 0.0094          | 0.0452          | 0.0273                      | 0.2340         |
| C18   | 0.0032          | 0.0114          | 0.0083                      | 0.2476         |
| N19   | 0.0092          | 0.0044          | 0.0068                      | -0.3950        |
| C20   | 0.0070          | 0.0054          | 0.0062                      | 0.2499         |
| C21   | 0.0048          | 0.0032          | 0.0040                      | 0.2217         |
| O22   | 0.0012          | 0.0010          | 0.0011                      | -0.3210        |
| O23   | 0.0168          | 0.0114          | 0.0141                      | <b>-0.5985</b> |

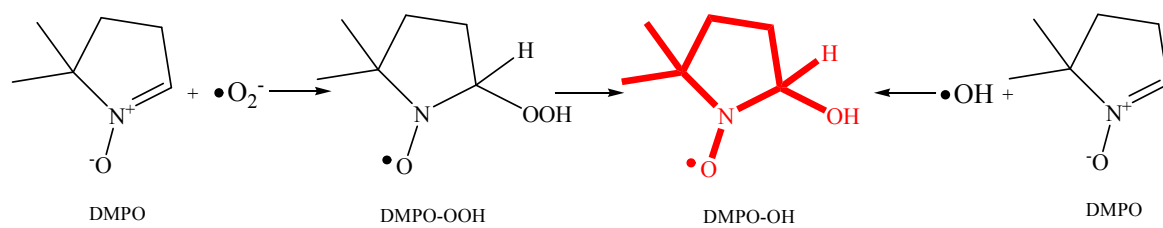

**Scheme S1** DMPO-OH production from 5,5-dimethyl-1-pyrroline *N*-oxide (DMPO)

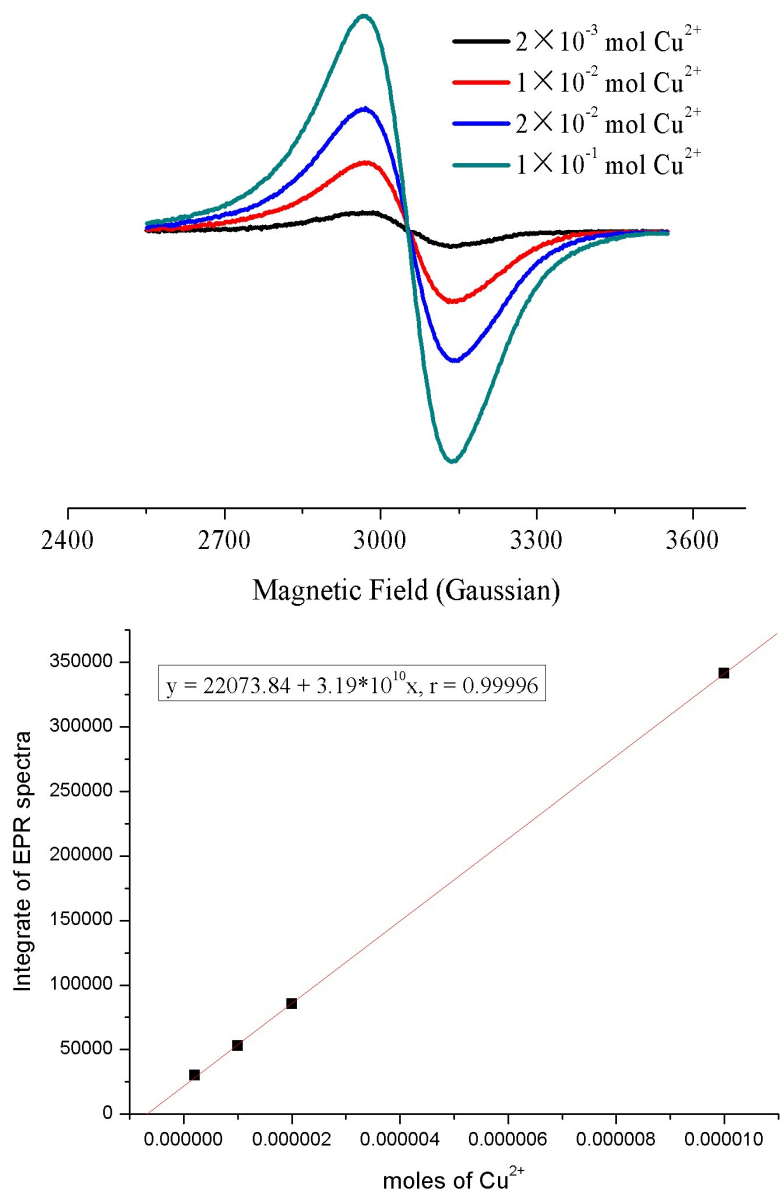

**Fig.S1** EPR spectra of  $\text{Cu}^{2+}$  and the calibration curve used to determine  $\text{Ti}^{3+}$  concentration

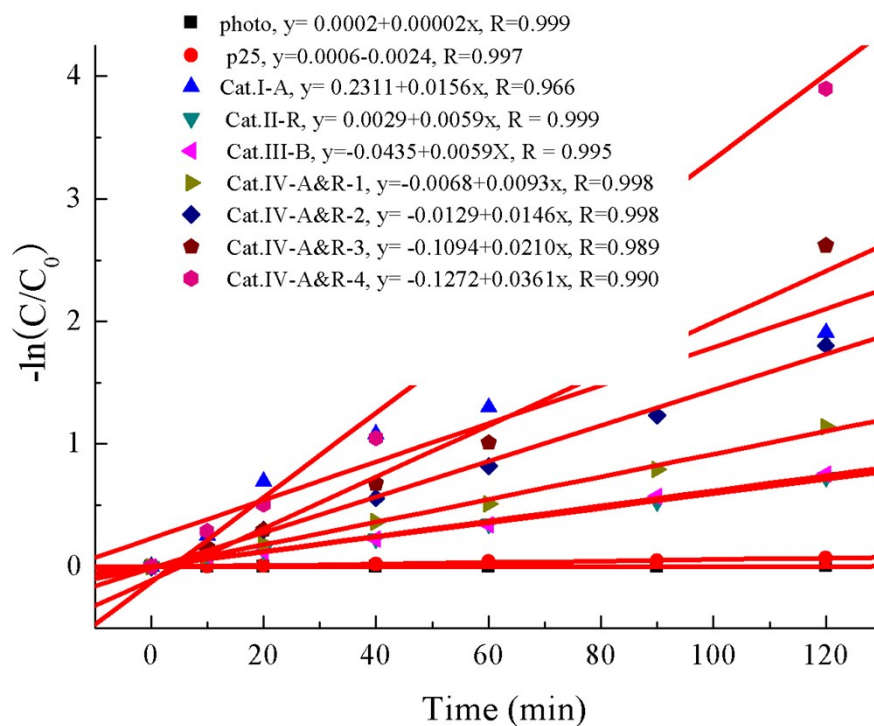

**Fig. S2** The plots of  $-\ln(C/C_0)$  versus reaction time (min) for degradation curves under different catalytic system

In order to obtain the adsorption isotherms of *Nor* on different  $\text{TiO}_{2-x}$ , 50 mL of *Nor* aqueous solutions with various initial concentrations of 25  $\mu\text{M}$ , 50  $\mu\text{M}$ , 100  $\mu\text{M}$ , 200  $\mu\text{M}$ , 400  $\mu\text{M}$ , 600  $\mu\text{M}$  and 800  $\mu\text{M}$  were placed in contact with 0.05 g of  $\text{TiO}_{2-x}$ . After 24 h of magnetic stirring in the dark, the aqueous samples were filtered through 0.45  $\mu\text{m}$  membranes to remove  $\text{TiO}_{2-x}$  powder before analyzing the concentration of *Nor* by HPLC.

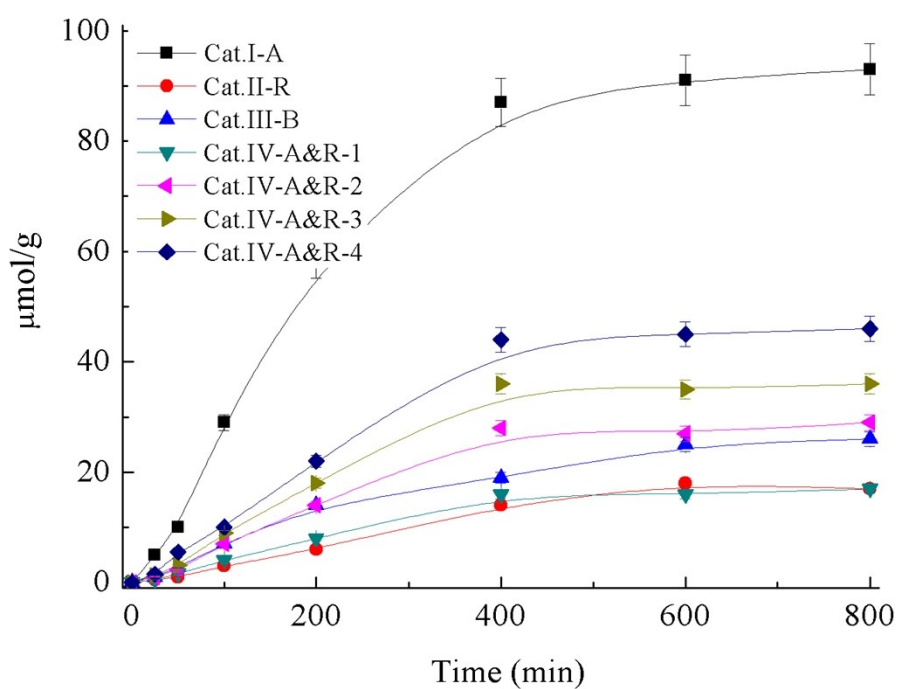

**Fig.S3** Adsorption isotherm of *Nor* on different  $\text{TiO}_{2-x}$ . ( $[\text{TiO}_{2-x}] = 1.0 \text{ g/L}$ , pH value =  $7.0 \pm 0.2$ )



# Mass spectra of *Nor* and *P1* to *P19*:

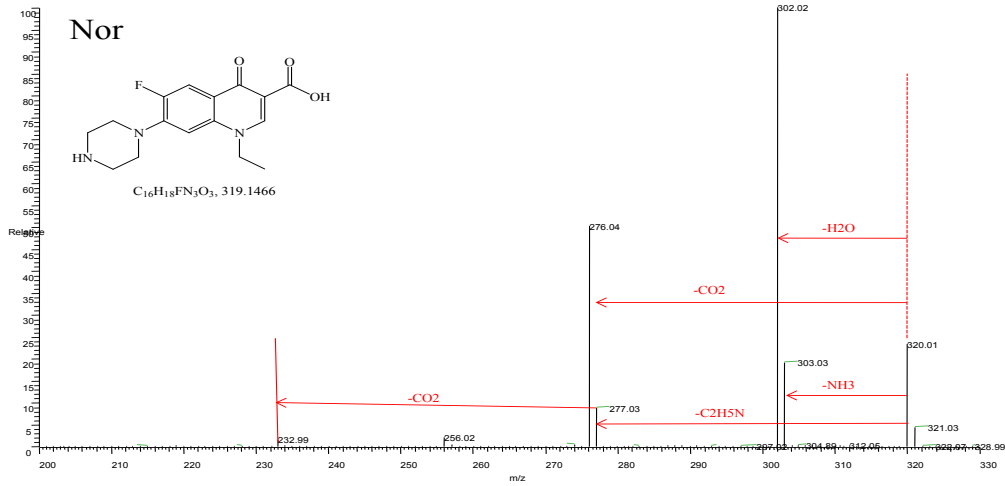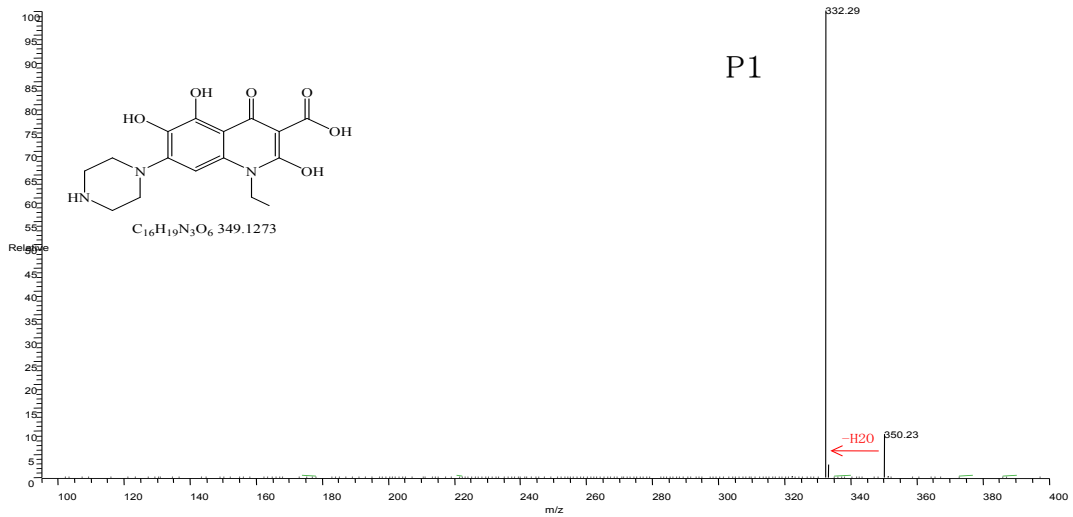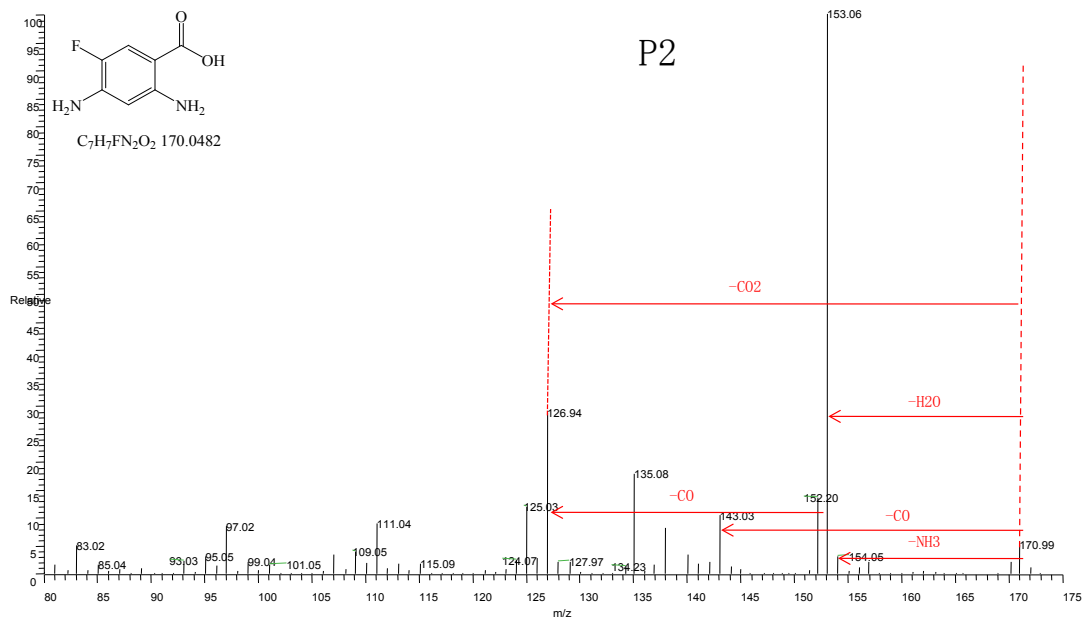

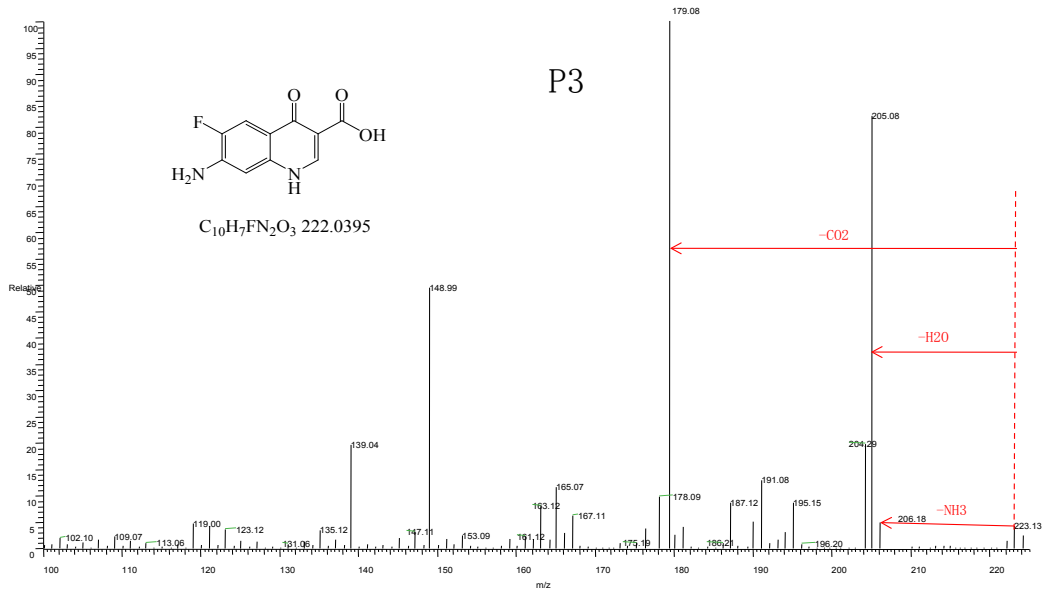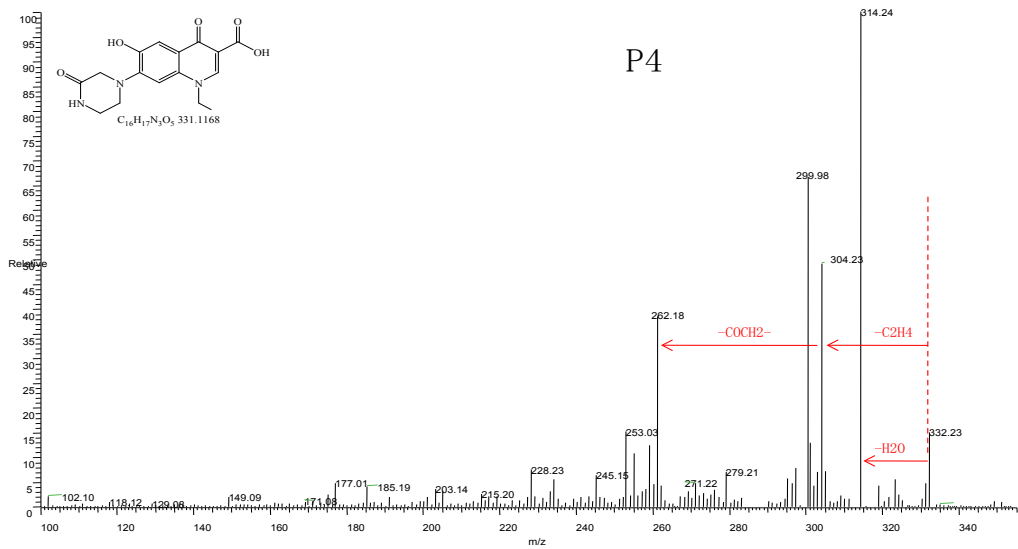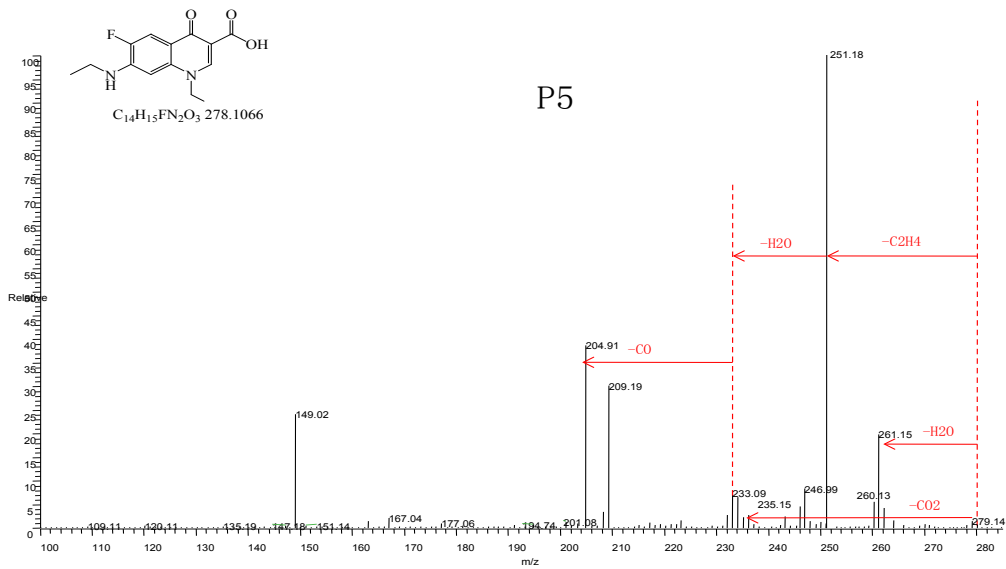

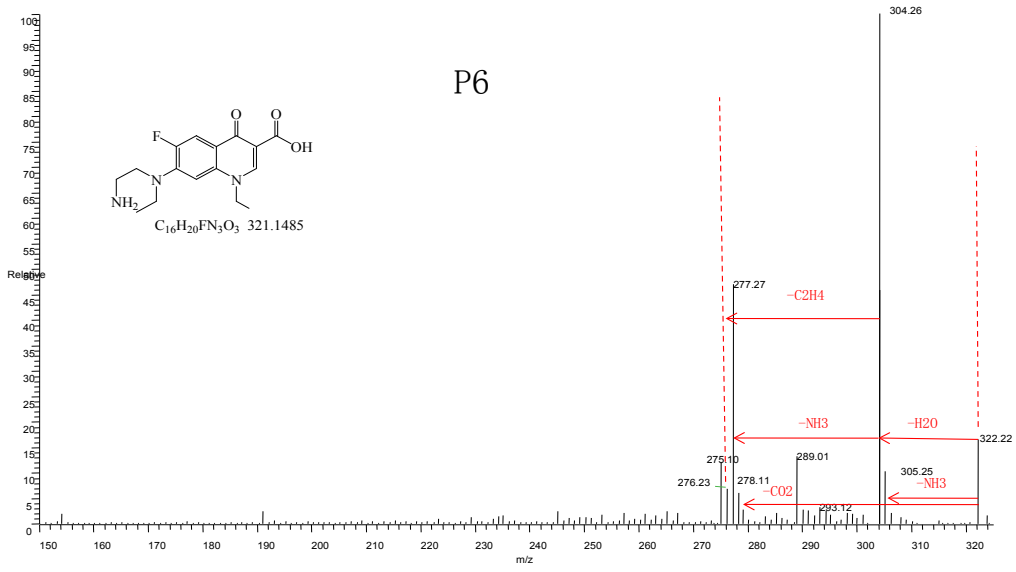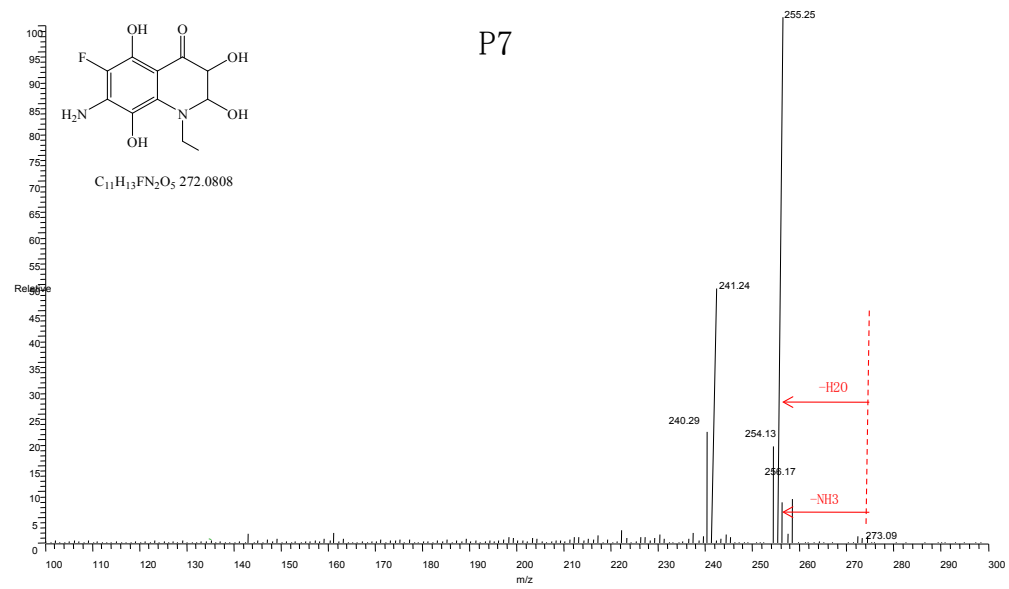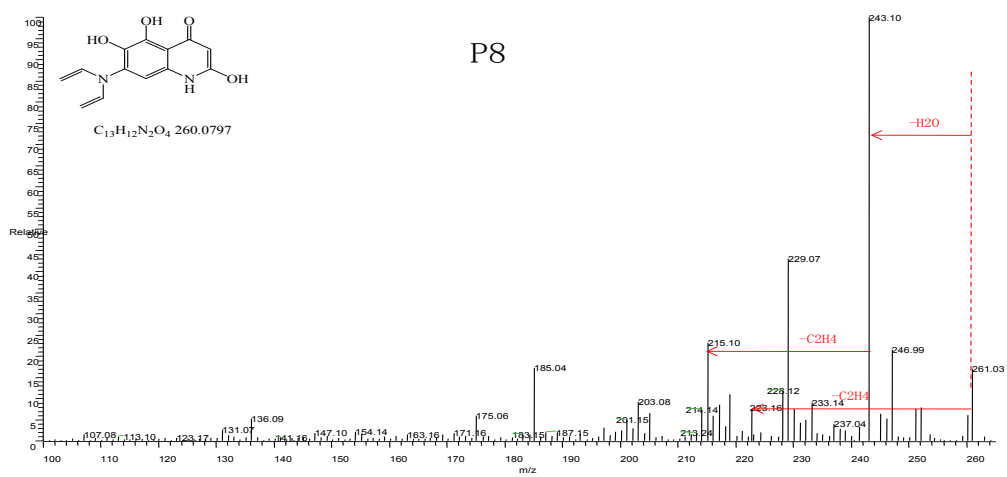

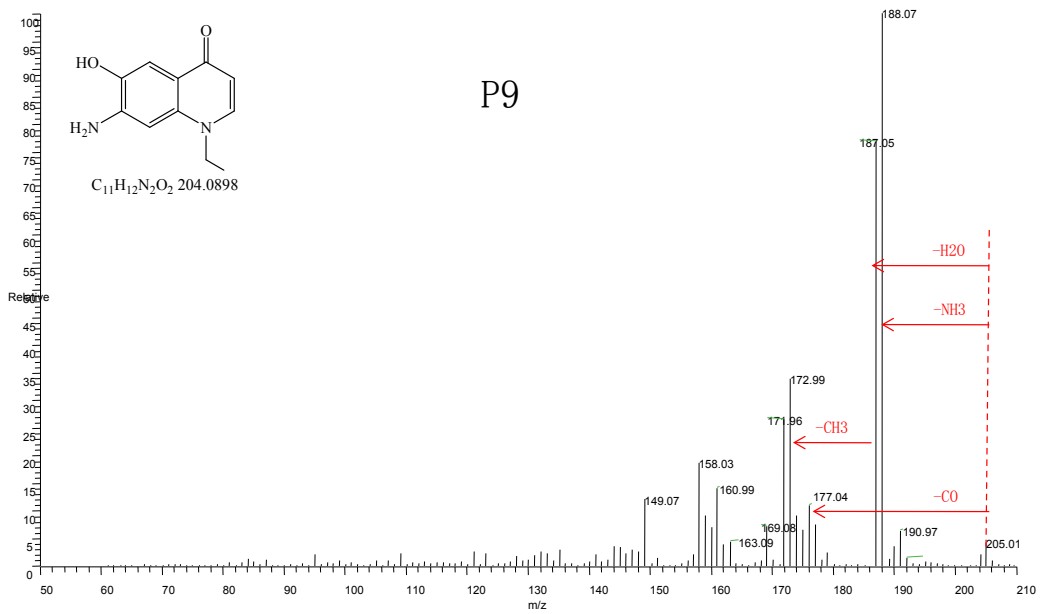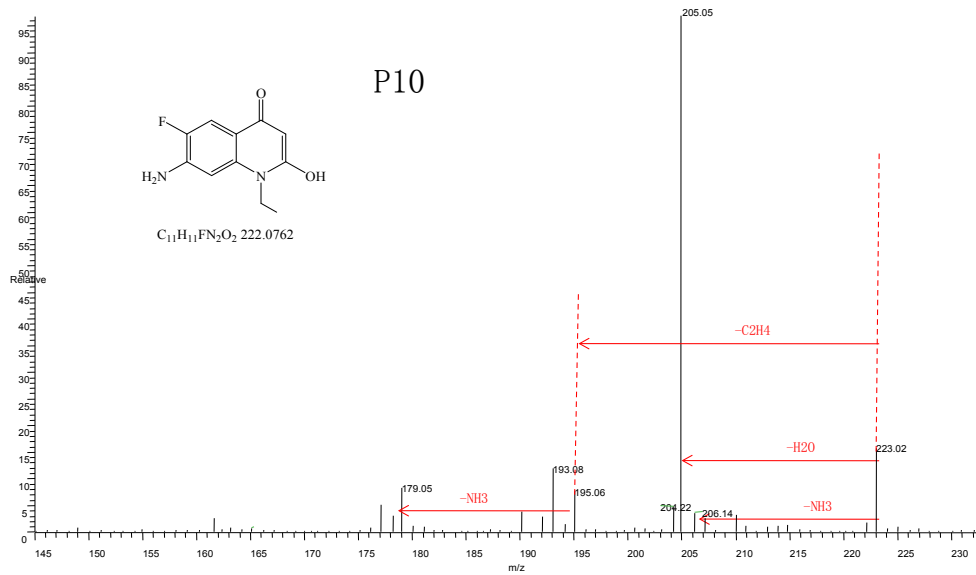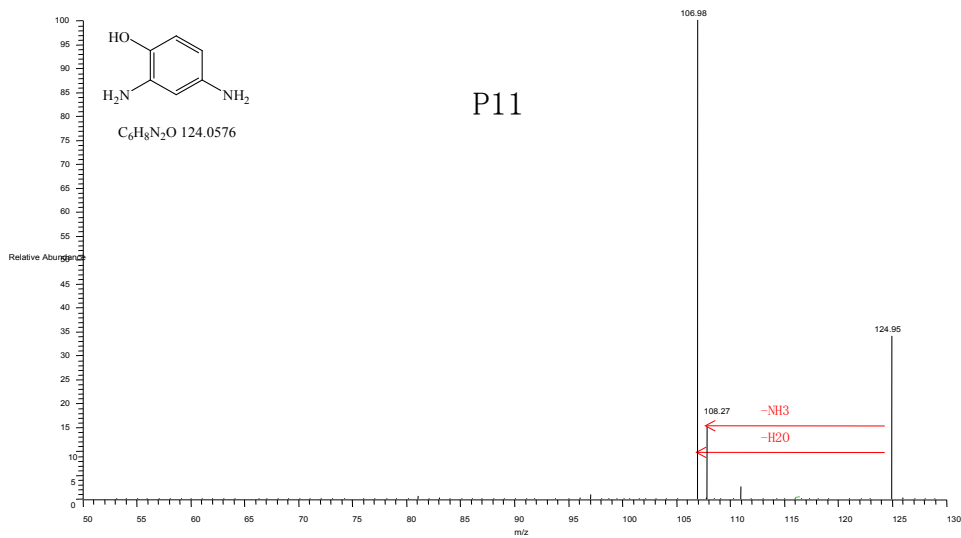

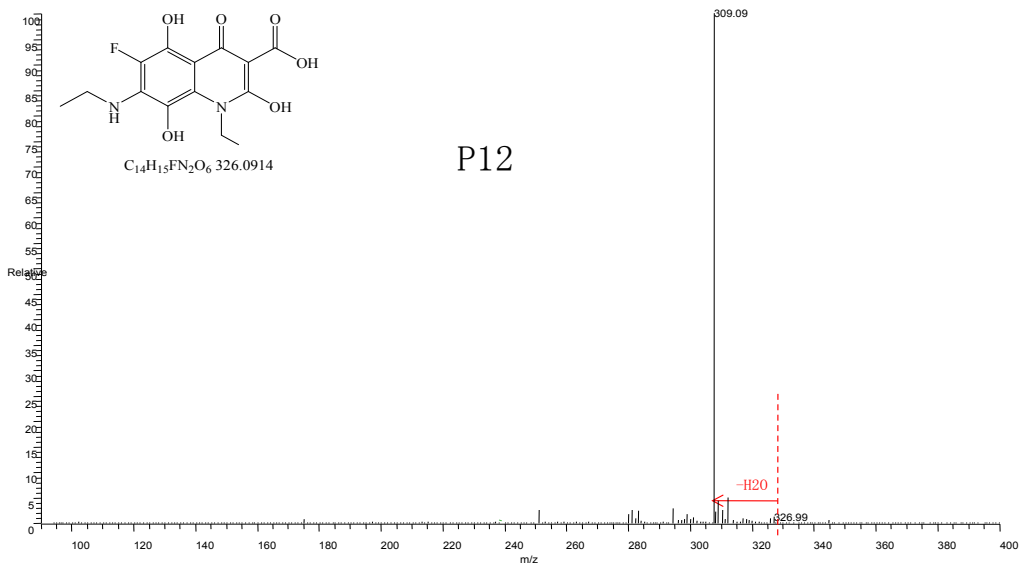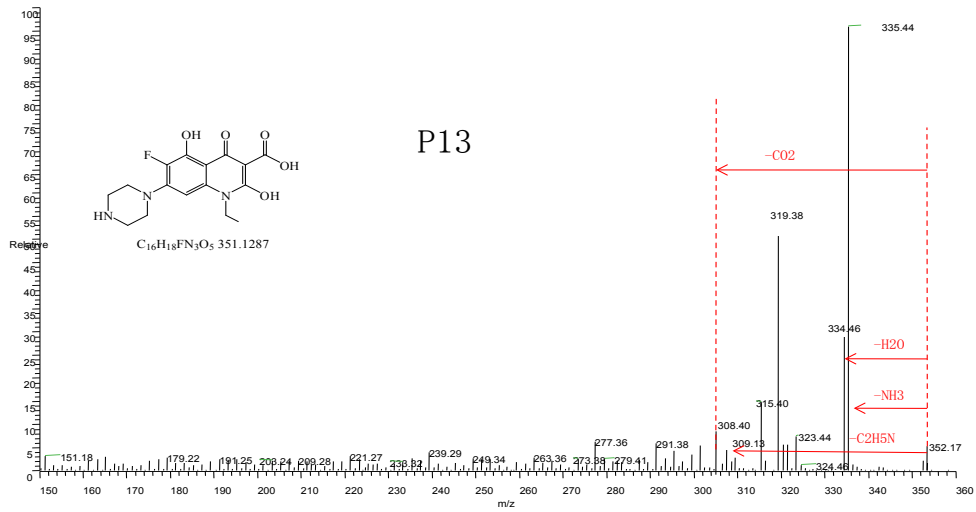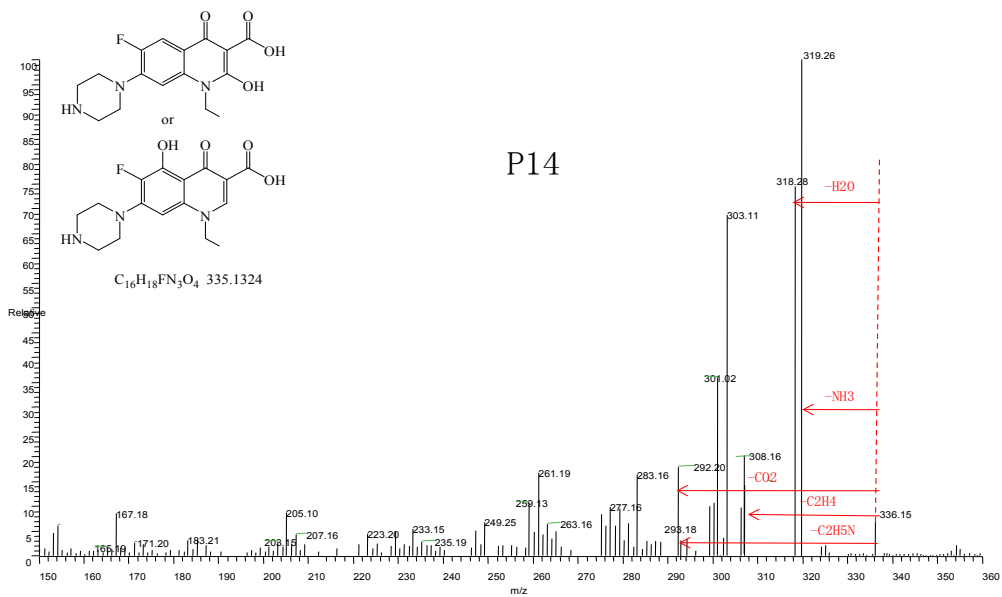

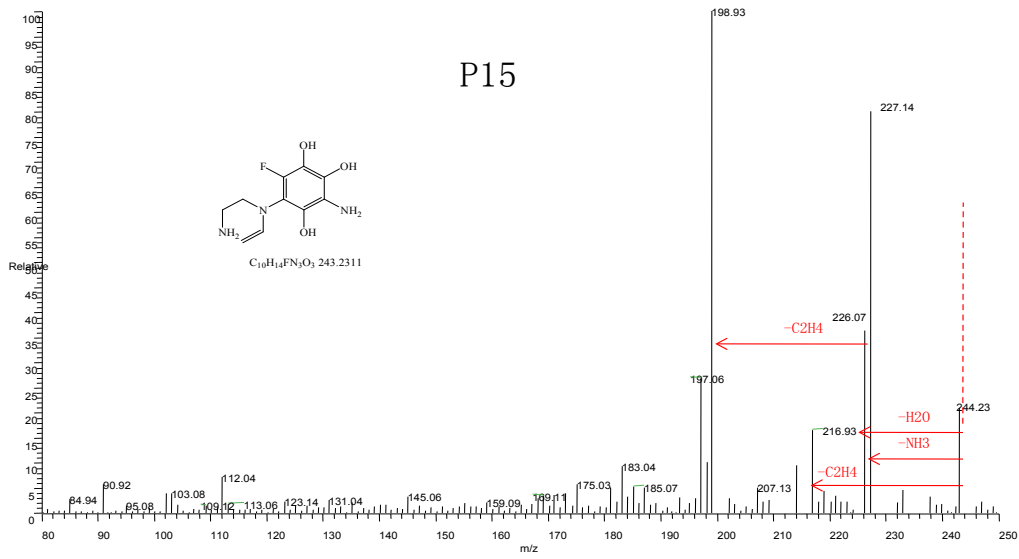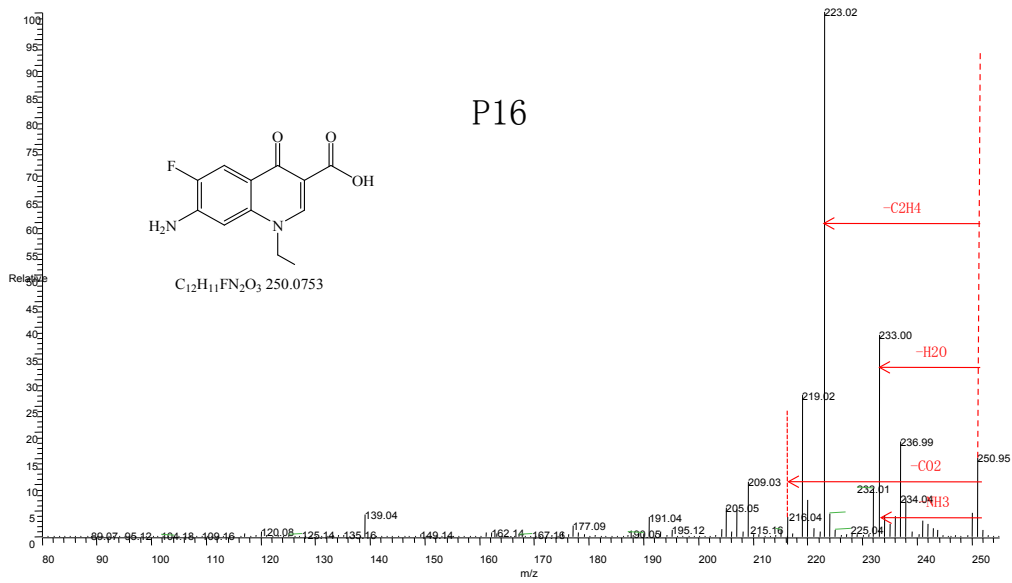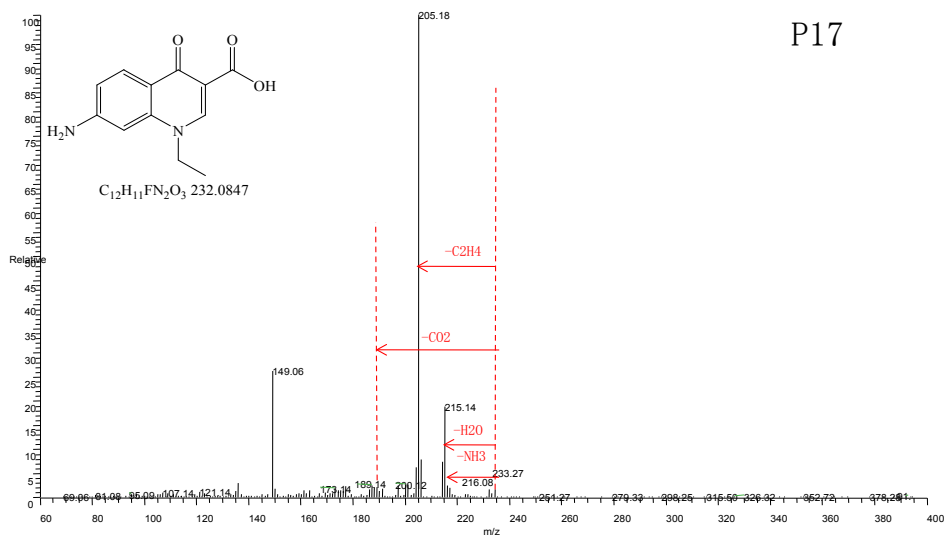

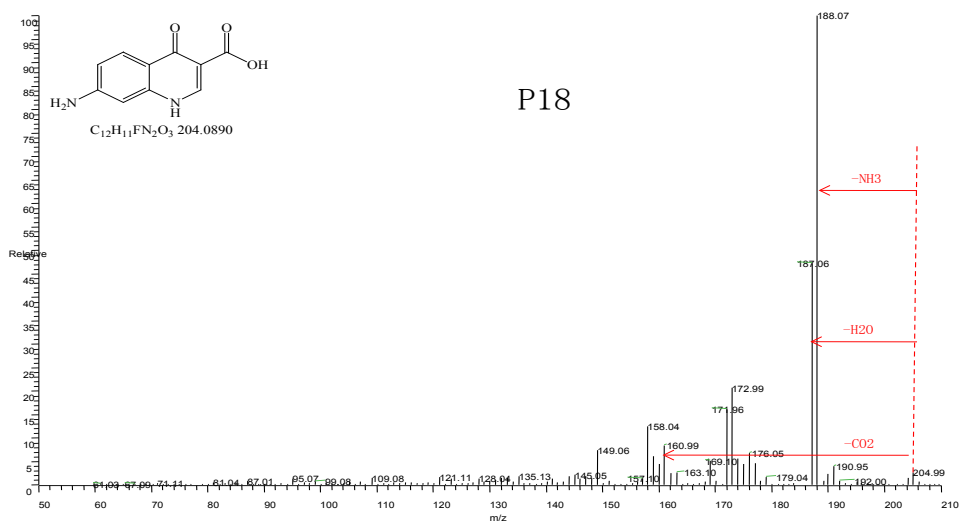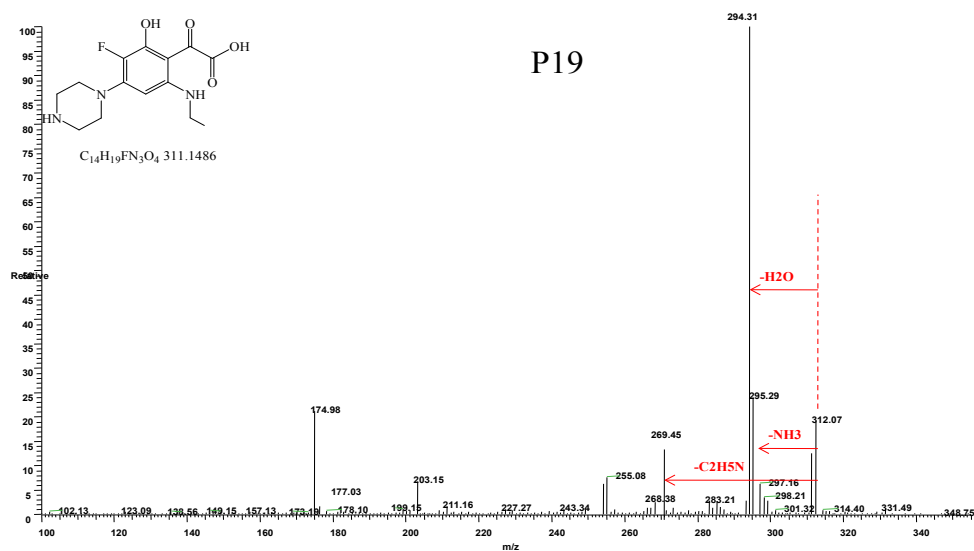

**Fig.S4** Product-ion spectra (MS/MS) of the  $[M+H]^+$  ions of *Nor* and its degradation intermediates *P1-P19*. The intermediates were purified by semi-preparative HPLC and the tandem mass spectra were acquired on an LTQ linear ion-trap mass spectrometer.
